# Supplementary material for: Rolling circle amplification-mediated in situ synthesis of palladium nanoparticles for the ultrasensitive electrochemical detection of microRNA
Source: Royal Society of Chemistry journal article supplement (doi:10.1039/c9an00427k), 2019-01-01
Supplement: c9an00427k1.pdf [file c9an00427k1.pdf]

## Supporting Information

### **Rolling circle amplification-mediated in situ synthesis of palladium nanoparticles for ultrasensitive electrochemical detection of microRNA**

Cuiling Zhang,<sup>a</sup> Dan Li,<sup>b</sup> Dongwei Li,<sup>c</sup> Kai Wen,<sup>a</sup> Xingdong Yang<sup>a</sup> and Ye Zhu<sup>\*a</sup>

- <sup>a.</sup> School of Chemistry and Chemical Engineering, Shandong University, Jinan 250100, China. \*Corresponding author: [zhuye@sdu.edu.cn](mailto:zhuye@sdu.edu.cn)
- <sup>b.</sup> Jinan Science and Technology Innovation Promotion Center, Jinan 250102, China.
- <sup>c.</sup> Advanced Materials Institute, Qilu University of Technology (Shandong Academy of Sciences), Jinan 250014, China.

**List of Contents:**

1. Table S1 Sequence information of the nucleic acids used in this work.
2. Fig. S1 Effects of (A) concentration of HP, (B) concentration of CT and (C) RCA incubation time on the sensor responses towards detection of 0.5 pM miRNA-21.
3. Fig. S2 Responses of four HP/AuE sensors prepared in the same conditions towards 10 fM miRNA-21.
4. Fig. S3 Responses of the developed biosensor towards 10 fM miRNA-21 after storage at 4 °C for 1, 3, 5, 7 and 15 days.
5. Fig. S4 DPV peak currents of the developed biosensor for miRNA-21 detection in human blood serums. Sample 1-3 were obtained from three healthy people and sample 4-6 were collected from three breast cancer patients.

**Table S1** Sequence information of the nucleic acids used in this work.

| Name                            | Sequences (5' to 3')                                                        |
|---------------------------------|-----------------------------------------------------------------------------|
| hairpin probe                   | HS-TTT TTT TTT CAA CAT CAG TCT GAT<br>AAG CTA ACT GAT GTT GAT ATT ACA<br>TT |
| miRNA-21                        | UAG CUU AUC AGA CUG AUG UUG A                                               |
| circular template               | p-AAC ATC AAA AAC CCA ACC CGC CCT<br>ACC CAA AAA ATG TAA TAT C              |
| single-base mismatched miRNA-21 | UAG CUU AUC GGA CUG AUG UUG A                                               |
| three-base mismatched miRNA-21  | UUG CUU AUC GGA CUG AUC UUG A                                               |
| miRNA-141                       | UAA CAC UGU CUG GUA AAG AUG G                                               |
| let-7d                          | AGA GGU AGU AGG UUG CAU AGU U                                               |

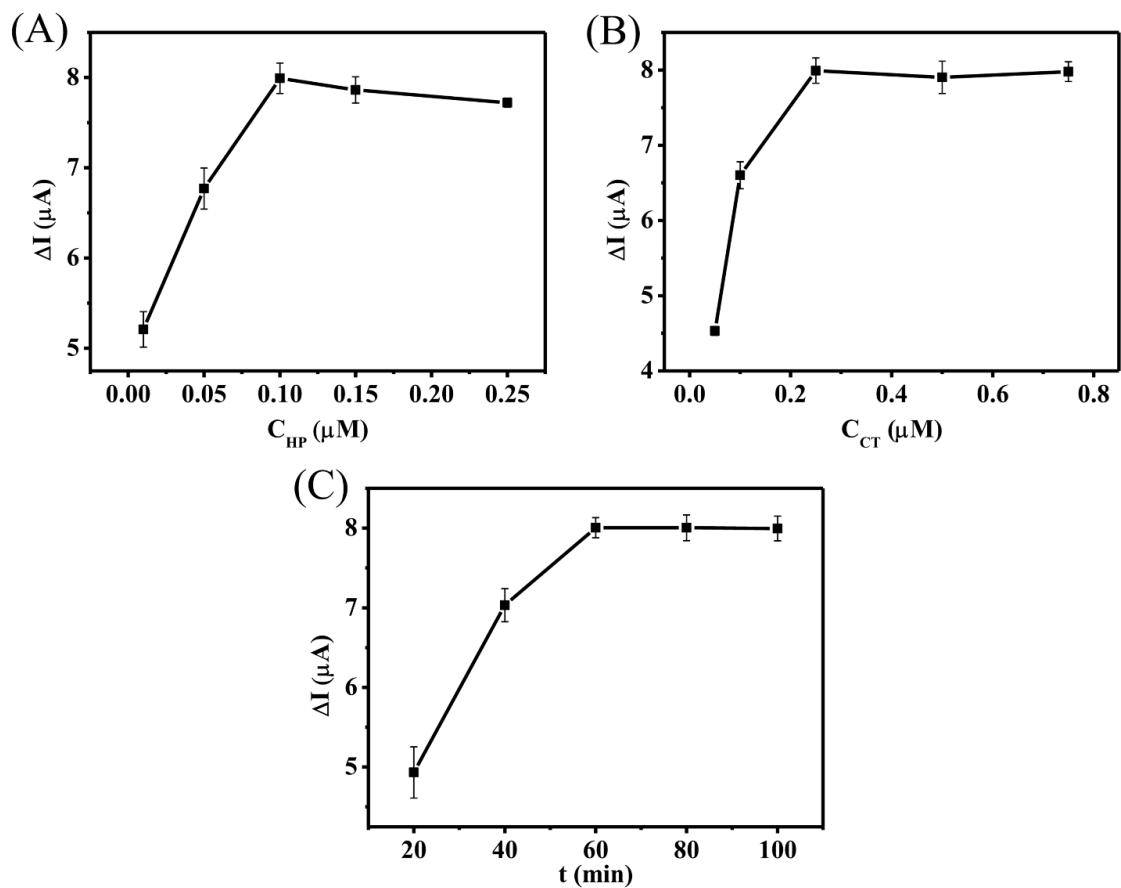

**Fig. S1** Effects of (A) concentration of HP, (B) concentration of CT and (C) RCA incubation time on the sensor responses towards detection of 0.5 pM miRNA-21.

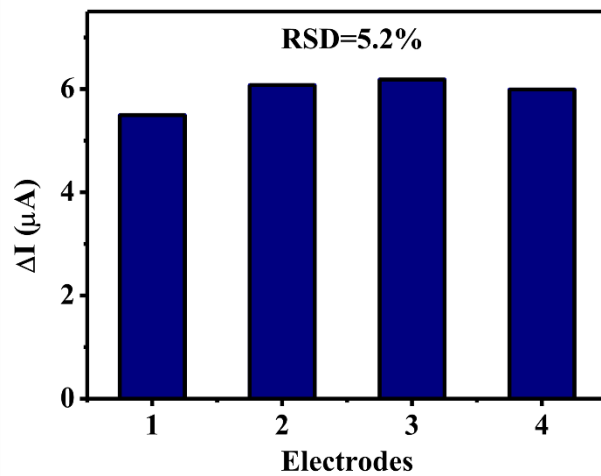

**Fig. S2** Responses of four HP/AuE sensors prepared in the same conditions towards 10 fM miRNA-21.

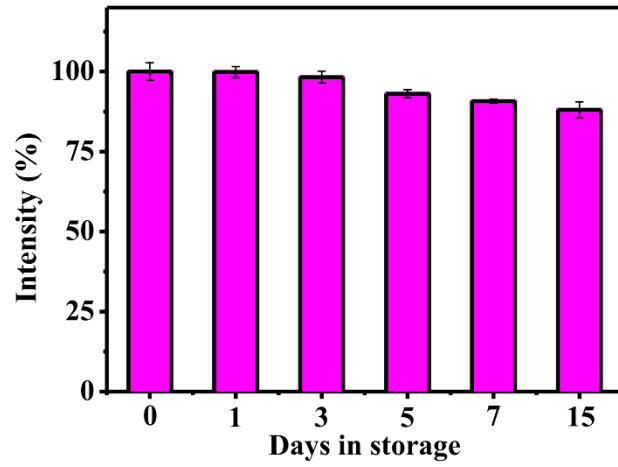

**Fig. S3** Responses of the developed biosensor towards 10 fM miRNA-21 after storage at 4 °C for 1, 3, 5, 7 and 15 days.

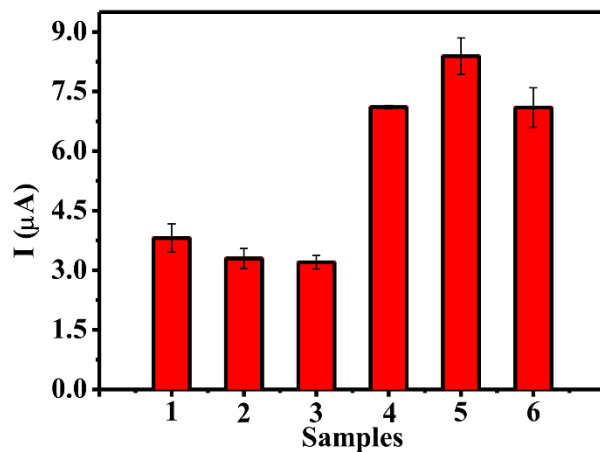

**Fig. S4** DPV peak currents of the developed biosensor for miRNA-21 detection in human blood serums. Sample 1-3 were obtained from three healthy people and sample 4-6 were collected from three breast cancer patients.
